# Supplementary material for: Physicians’ Influence on Primary Care Patients’ Reluctance to Use Mental Health Treatment
Source: Atypon-hosted journal article supplement (doi:10.1176/appi.ps.201300064), 2014-04-01
Supplement: 541_ds001.pdf [file 541_ds001.pdf]

## **APPENDIX: Sampling**

The sample was constructed by interviewing consecutive patients who were screened by a short questionnaire in order to select those who meet the study criteria (aged 25-75 and having visited the clinic at least once during the year prior to the interview). Respondents were recruited by specially trained interviewers. The full nature of the study was explained to the respondents and only those who signed informed consent forms (77% of those eligible) were included. Patients were interviewed at home in Hebrew or Russian, according to respondents' request.

## **APPENDIX: Instruments**

The Brief Symptom Inventory (BSI)-18 (a shortened version of the BSI), a self-report scale for identifying psychological distress, includes subscales for somatization, depression, and anxiety, as well as an overall index, the GSI. The BSI-18 internal consistency estimates are quite satisfactory (1). Cronbach's alpha in our study was .88. The score is obtained by converting total scores on each of the scales into t-scores, based on Israeli normative data from the community (2). A t-score of 63 or higher on the GSI or at least on two of the three subscales indicates psychological distress.

The Composite International Diagnostic Interview - Short Form (CIDI-SF), a diagnostic instrument developed by the WHO specifically for obtaining mental health diagnoses in epidemiological studies (3). This instrument diagnosed patients with depression or anxiety (general anxiety, panic disorder or obsessive compulsive disorder -OCD). The CIDI-SF algorithm gives a precise cut-off point for a diagnosis of general anxiety. As for depression, panic disorder and OCD, it provides the probability of a diagnosis for different scores. In our study, a score of 4-7 defines a diagnosis of depression (probability of 81-91%); for panic disorder, a score of 3-6 is required (probability of 87-100%) and for OCD, a score of 3 (probability of 84%). In the analyses, we also defined a four-category variable of psychiatric diagnosis (neither depression nor anxiety; only anxiety; only depression; both depression and anxiety).

## **References**

1. Derogatis LR: The Brief Symptom Inventory -18 (BSI-18): administration, scoring and proceduresmanual. Minneapolis, National Computer Systems, 2000

2. Gilbar O, Ben-Zur H: Adult Israeli community norms for the Brief Symptom Inventory (BSI). *International Journal of Stress Management* 9:1-10, 2002
3. Kessler RC, Andrews G, Mroczek D, et al.: The world health organization composite international diagnostic interview short-form (CIDI-SF). *International Journal of Methods in Psychiatric Research* 7:171-185, 1998

**APPENDIX: Predictors of the attitude towards getting treatment from a mental health**

professional (multinomial logistic regression)

| Variables in the model                                  | Likelihood Ratio Tests<br>P <sup>3</sup> | Attitude towards getting treatment from a mental health professional |                       |       |                                     |                       |      |                                     |                       |       |
|---------------------------------------------------------|------------------------------------------|----------------------------------------------------------------------|-----------------------|-------|-------------------------------------|-----------------------|------|-------------------------------------|-----------------------|-------|
|                                                         |                                          | Positive vs. Negative <sup>1</sup>                                   |                       |       | Uncertain vs. Negative <sup>1</sup> |                       |      | Uncertain vs. Positive <sup>2</sup> |                       |       |
|                                                         |                                          | O.R. <sup>4</sup>                                                    | 95% C.I. <sup>5</sup> | P     | O.R. <sup>4</sup>                   | 95% C.I. <sup>5</sup> | P    | O.R. <sup>4</sup>                   | 95% C.I. <sup>5</sup> | P     |
| Female (reference: Male)                                | .013                                     | 1.95                                                                 | 1.25-3.04             | .003  | 1.75                                | 1.10-2.77             | .018 | .90                                 | .64-1.25              | ns    |
| Place of Birth (reference: Former Soviet Union)         | .001                                     |                                                                      |                       |       |                                     |                       |      |                                     |                       |       |
| Middle East                                             |                                          | 3.22                                                                 | 1.27-8.17             | .014  | .93                                 | .35-2.44              | ns   | .29                                 | .15-.57               | <.001 |
| North Africa                                            |                                          | 1.77                                                                 | .81-3.86              | ns    | .88                                 | .40-1.93              | ns   | .50                                 | .28-.88               | .016  |
| Western Countries <sup>6</sup>                          |                                          | 3.07                                                                 | 1.34-7.03             | .008  | .94                                 | .40-2.20              | ns   | .31                                 | .17-.55               | <.001 |
| Israel                                                  |                                          | 2.63                                                                 | 1.24-5.58             | .012  | 1.32                                | .62-2.80              | ns   | .50                                 | .30-.83               | .007  |
| Age (years) (reference: 65-75)                          | <.001                                    |                                                                      |                       |       |                                     |                       |      |                                     |                       |       |
| 25-34                                                   |                                          | 1.92                                                                 | .83-4.42              | ns    | 1.20                                | .52-2.77              | ns   | .63                                 | .36-1.09              | ns    |
| 35-44                                                   |                                          | 2.27                                                                 | 1.07-4.81             | .032  | .66                                 | .30-1.44              | ns   | .29                                 | .17-.51               | <.001 |
| 45-54                                                   |                                          | 3.53                                                                 | 1.75-7.11             | <.001 | 1.27                                | .62-2.60              | ns   | .36                                 | .22-.58               | <.001 |
| 55-64                                                   |                                          | 2.31                                                                 | 1.25-4.27             | .007  | .83                                 | .44-1.57              | ns   | .36                                 | .23-.57               | <.001 |
| Education (years) (reference:0-8)                       | .028                                     |                                                                      |                       |       |                                     |                       |      |                                     |                       |       |
| 9-12                                                    |                                          | 1.45                                                                 | .83-2.55              | ns    | 1.22                                | .68-2.18              | ns   | .62                                 | .38-1.02              | ns    |
| 13+                                                     |                                          | 2.81                                                                 | 1.42-5.57             | .003  | 1.75                                | .87-3.55              | ns   | .84                                 | .54-1.31              | ns    |
| Religious Observance (reference: Ultra-Orthodox)        | .001                                     |                                                                      |                       |       |                                     |                       |      |                                     |                       |       |
| Secular                                                 |                                          | 7.38                                                                 | 2.62-20.81            | <.001 | 1.90                                | .73-4.96              | ns   | .26                                 | .11-.61               | .002  |
| Traditional/Observant                                   |                                          | 5.97                                                                 | 2.22-16.07            | <.001 | 2.07                                | .84-5.08              | ns   | .35                                 | .15-.81               | .014  |
| Modern-Orthodox                                         |                                          | 3.90                                                                 | 1.37-11.09            | .011  | 1.09                                | .41-2.90              | ns   | .28                                 | .11-.70               | .006  |
| Subjective Psychological Distress - No (reference: Yes) | .016                                     | .82                                                                  | .37-1.82              | ns    | 2.15                                | .85-5.42              | ns   | 2.61                                | 1.29-5.28             | .008  |

-2 Log Likelihood=944.185, N=867,  $\chi^2=120.16$ , df=30, p<.001, Pseudo R<sup>2</sup> Nagelkerke =.152

<sup>1</sup>Negative is the reference category of the dependent variable, attitude towards getting treatment from a mental health professional

<sup>2</sup>Positive is the reference category of the dependent variable, attitude towards getting treatment from a mental health professional

<sup>3</sup>The significance is for the chi-square statistic which is the difference in -2 log-likelihoods between the final model and a reduced model. The reduced model is formed by omitting an effect from the final model. The null hypothesis is that all parameters of that effect are 0.

<sup>4</sup>O.R.: odds ratio

<sup>5</sup>95% C.I.: 95% confidence interval of odds ratio

<sup>6</sup>Western Countries were defined as Europe (except the Former Soviet Union), North America and South Africa

**APPENDIX: Predictors of the influence of the primary care physician on the patients' attitude towards getting treatment from a mental health professional among patients who initially had an 'uncertain' or 'negative' attitude (logistic regression)**

| Variables in the model                                                                                          | Positive influence vs. no influence <sup>1</sup> |                       |      |
|-----------------------------------------------------------------------------------------------------------------|--------------------------------------------------|-----------------------|------|
|                                                                                                                 | O.R. <sup>2</sup>                                | 95% C.I. <sup>3</sup> | P    |
| Place of Birth (reference: Middle East)                                                                         |                                                  |                       | .001 |
| Former Soviet Union                                                                                             | 6.84                                             | 1.86-25.10            | .004 |
| North Africa                                                                                                    | 5.12                                             | 1.42-18.47            | .013 |
| Western Countries <sup>4</sup>                                                                                  | 9.96                                             | 2.62-37.84            | .001 |
| Israeli born                                                                                                    | 3.10                                             | .87-11.02             | ns   |
| Psychiatric Diagnosis (4 categories) (reference: Neither Depression nor Anxiety <sup>5</sup> )                  |                                                  |                       | .022 |
| Only Anxiety <sup>5</sup>                                                                                       | .40                                              | .13-1.22              | ns   |
| Only Depression                                                                                                 | 1.53                                             | .76-3.09              | ns   |
| Both Depression and Anxiety <sup>5</sup>                                                                        | 2.71                                             | 1.16-6.31             | .021 |
| A priori attitude towards getting treatment from a mental health professional - Uncertain (reference: Negative) | 2.62                                             | 1.48-4.61             | .001 |

<sup>1</sup>No influence - remains with an uncertain or negative attitude towards getting treatment from a mental health professional is the reference category of the dependent variable

<sup>2</sup>O.R.: odds ratio

<sup>3</sup>95% C.I. of O.R.: 95% confidence interval of odds ratio

<sup>4</sup>Western Countries were defined as Europe (except the Former Soviet Union), North America and South Africa

<sup>5</sup>Anxiety (General anxiety, Panic attacks, Obsessive-compulsive disorder)
